# Supplementary material
Source: Royal Society of Chemistry journal article supplement (doi:10.1039/d6sd00040a)
Supplement: d6sd00040a1.pdf [file d6sd00040a1.pdf]

## Supporting Information

### Cobalt Molybdenum Oxide Nanorod Decorated Carbon Yarn for Non-enzymatic Electrochemical Detection of Epinephrine

Pranav Mecheri<sup>a</sup>, Swathi Vaidyanatha Iyer<sup>a</sup>, Lekshmi Bindu Raveendran<sup>a</sup>, and Mini Mol Menamparambath<sup>a\*</sup>

<sup>a</sup>Department of Chemistry, National Institute of Technology Calicut, Calicut-673601 Kerala, India.

| Amount of Reagents (in mmol) Used in 20 mL of Solvent |                                     |                        | Sample code |
|-------------------------------------------------------|-------------------------------------|------------------------|-------------|
| Cobalt nitrate<br>(in water)                          | Ammonium<br>molybdate<br>(in water) | Urea<br>(in n-butanol) |             |
| 0.5                                                   | 0.5                                 | 12                     | CM-A        |
| 1                                                     | 1                                   | 12                     | CM-B        |
| 2                                                     | 2                                   | 12                     | CM-C        |

**Table S1:** Experimental details of the interface-assisted synthesis of CMO with their corresponding product code.

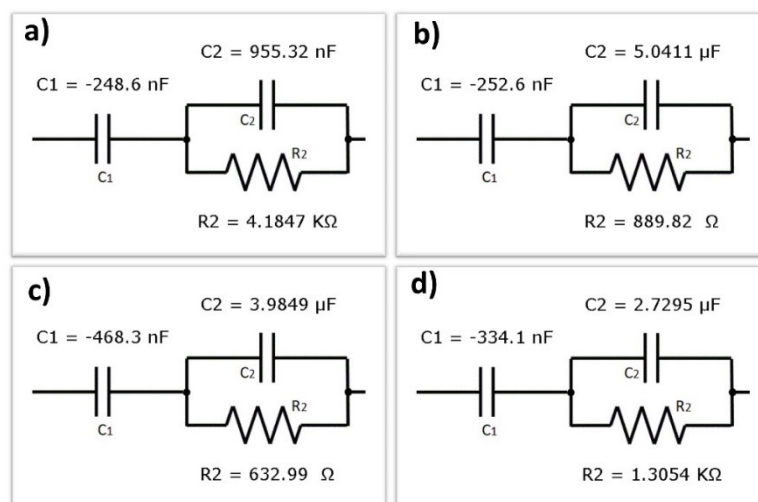

**Figure S1:** EIS Equivalent circuits of (a) Bare CY, (b) CM-A/CY, (c) CM-B/CY, and (d) CM-C/CY.

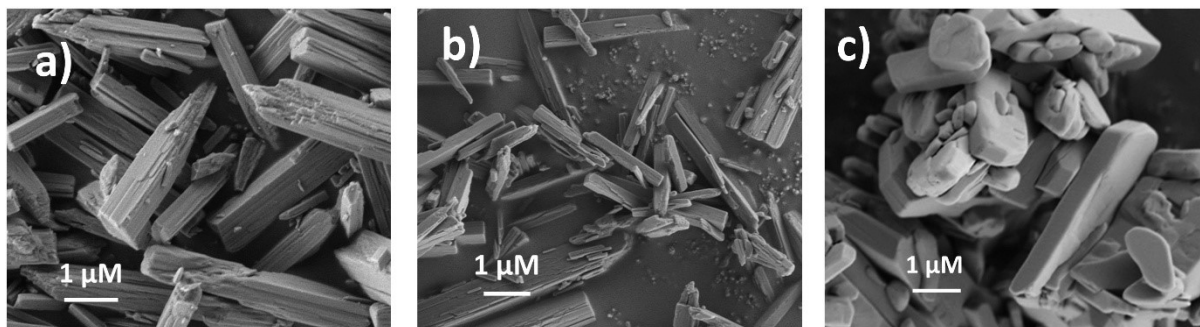

**Figure S2:** SEM images of CM-A (a), CM-B (b), and CM-C.

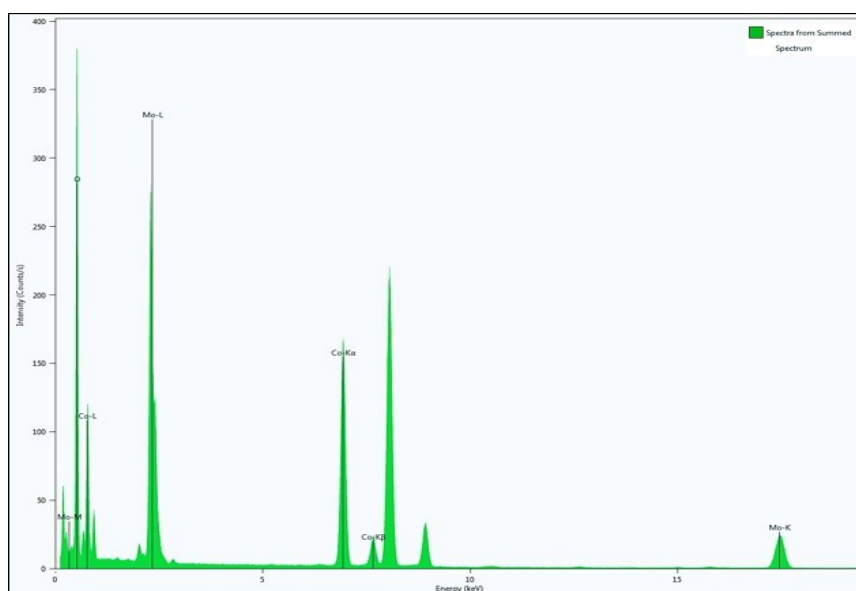

**Figure S3:** EDS spectra of CM-B.

| Material                       | Method of detection | LOD       | Linear range  | Real sample               | Ref. |
|--------------------------------|---------------------|-----------|---------------|---------------------------|------|
| Mn <sub>2</sub> O <sub>3</sub> | DPV                 | 0.13 μM   | 500 nM–325 μM | Human urine, Human serum  | 1    |
| Nb <sub>2</sub> C MXene/COF    | DPV                 | 1.09 μM   | 1- 10 μM      | Human urine, Human serum  | 2    |
| CD@Tb                          | Ratiometric PL      | 0.0012 μM | 0- 0.1μM      | Human serum               | 3    |
| GNRs                           | DPV                 | 2.1 μM    | 6.4-100 μM    | pharmaceutical product    | 4    |
| OMC-NiO                        | DPV                 | 85 nM     | 0.8- 50 μM    | EP injection, Human serum | 5    |

|                                       |     |                       |                         |                                  |                      |
|---------------------------------------|-----|-----------------------|-------------------------|----------------------------------|----------------------|
| CNF-AuNPs                             | SWV | 1.5 $\mu\text{M}$     | 50- 1000 $\mu\text{M}$  | human serum                      | 6                    |
| ZnO/MWCNTs                            | DPV | 0.016 $\mu\text{M}$   | 0.4- 2.4 $\mu\text{M}$  | EP injection,<br>Human serum     | 7                    |
| MoS <sub>2</sub> /N-rGO               | CV  | 3.9 $\mu\text{M}$     | 2– 63 $\mu\text{M}$     | Spiked water<br>samples          | 8                    |
| EDDPT/GO/CPE                          | DPV | 0.65 $\mu\text{M}$    | 1.5–600.0 $\mu\text{M}$ | Drug samples,<br>human serum     | 9                    |
| TiO <sub>2</sub> -rGO NFs             | DPV | 0.00811 $\mu\text{M}$ | 0.01– 0.1 $\mu\text{M}$ | EP injection,<br>Human serum     | 10                   |
| CoMoO <sub>4</sub> .nH <sub>2</sub> O | DPV | 0.00214 $\mu\text{M}$ | 0.2-1 $\mu\text{M}$     | EP injection<br>Artificial sweat | <b>This<br/>work</b> |

**Table S2:** Comparison of electrochemical sensors for Epinephrine detection.

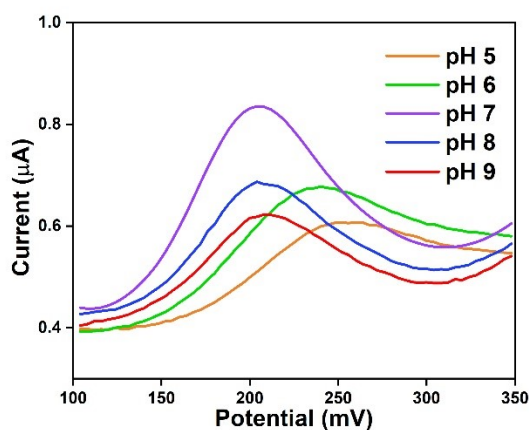

**Figure S4:** DPV of CM-B/CY at different pH.

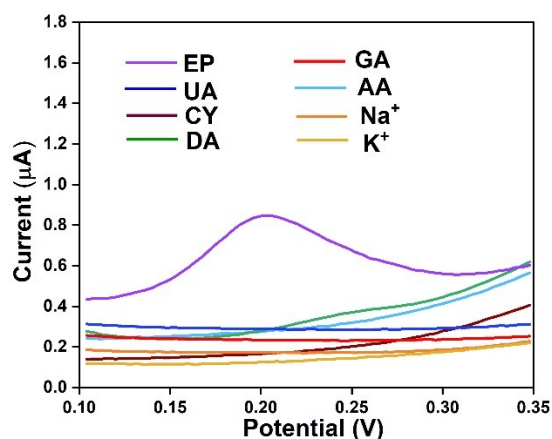

**Figure S5:** DPV of EP (1  $\mu\text{M}$ ) and interfering agents (100  $\mu\text{M}$ ).

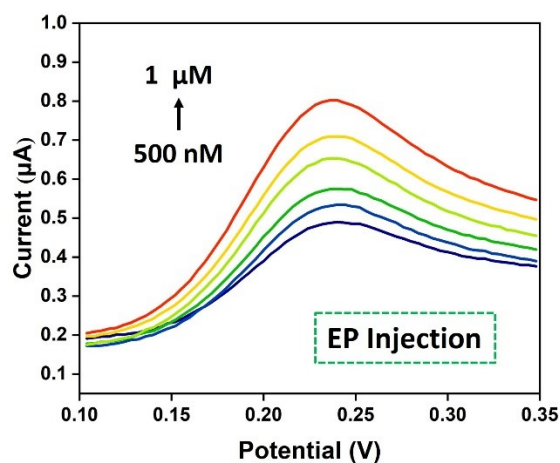

**Figure S6:** DPV of EP injection at different additions of standard EP (500 nM-1µM).

| Sl. No. | Added concentration (µM) | Output cathodic current in std solution (µA) | Output current in EP injection (µA) | Recovery Concentration (µM) | % Recovery | RSD (%) |
|---------|--------------------------|----------------------------------------------|-------------------------------------|-----------------------------|------------|---------|
| 1       | 500                      | 0.52                                         | 0.48                                | 435                         | 87.00      | 9.83    |
| 2       | 600                      | 0.58                                         | 0.53                                | 524                         | 87.33      | 9.56    |
| 3       | 700                      | 0.64                                         | 0.57                                | 585                         | 83.57      | 12.65   |
| 4       | 800                      | 0.69                                         | 0.64                                | 691                         | 86.37      | 10.33   |
| 5       | 900                      | 0.75                                         | 0.71                                | 802                         | 89.11      | 8.14    |
| 6       | 1000                     | 0.84                                         | 0.80                                | 943                         | 94.30      | 4.15    |

**Table S3:** Recovery results of EP in EP injection.

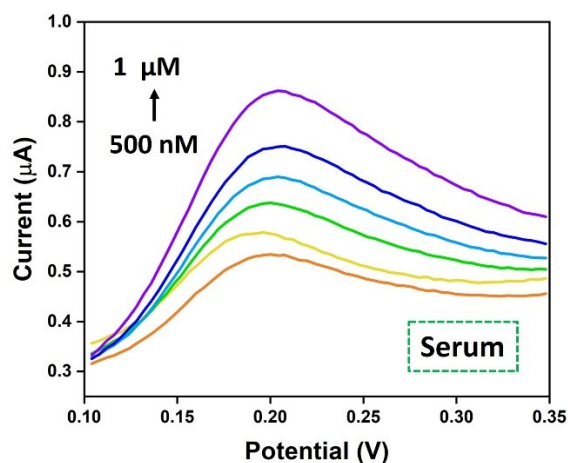

**Figure S7:** DPV of serum at different additions of standard EP (500 nM-1µM).

| Sl. No. | Added concentration (µM) | Output cathodic current in std solution (µA) | Output current in Serum (µA) | Recovery Concentration (µM) | % Recovery | RSD (%) |
|---------|--------------------------|----------------------------------------------|------------------------------|-----------------------------|------------|---------|
| 1       | 500                      | 0.52                                         | 0.53                         | 521                         | 104.2      | 2.91    |
| 2       | 600                      | 0.58                                         | 0.585                        | 605                         | 100.83     | 0.58    |
| 3       | 700                      | 0.64                                         | 0.63                         | 681                         | 97.28      | 1.94    |
| 4       | 800                      | 0.69                                         | 0.68                         | 757                         | 94.62      | 3.90    |
| 5       | 900                      | 0.75                                         | 0.74                         | 849                         | 94.33      | 4.12    |
| 6       | 1000                     | 0.84                                         | 0.86                         | 1031                        | 103.1      | 2.16    |

**Table S4:** Recovery results of EP in serum.

## References

- (1) Rehman, S. U.; Babulal, S. M.; Wu, H. Oxygen-Deficient Mn<sub>2</sub>O<sub>3</sub> Nanosheets for Dual Colorimetric and Electrochemical Detection of Epinephrine. *ACS Appl. Nano Mater.* **2024**.
- (2) Punniamorthy, M.; Soosaimanickam, C.; Kathiresan, M.; Alwarappan, S. 2D Nb<sub>2</sub>C

- MXene/COF Composite as Electrochemical Platform for the Stress Marker Epinephrine Detection. *ACS Appl. Nano Mater.* **2025**.
- (3) Mohapatro, U.; Senapati, P. K.; Bhutia, S. K.; Mohapatra, S. Carbon Dot Fluorescent Nanoprobe for Dual-Channel Detection of Epinephrine and Pyrophosphate in Live Cells. *Anal. Chem.* **2025**.
  - (4) Sainz, R.; Pozo, M.; Varela, M. V.; Esteban, J. C.; Corral, M. P.; Vázquez, L.; Blanco, E.; Peña, D.; Gago, J. A. M.; Ellis, G. J.; Dolores, M.; Domínguez, P.; Quintana, C.; Casero, E. Chemically Synthesized Chevron - like Graphene Nanoribbons for Electrochemical Sensors Development : Determination of Epinephrine. *Sci. Rep.* **2020**, 1–11.
  - (5) Yang, X.; Zhao, P.; Xie, Z.; Ni, M.; Wang, C.; Yang, P.; Xie, Y.; Fei, J. Selective Determination of Epinephrine Using Electrochemical Sensor Based on Ordered Mesoporous Carbon / Nickel Oxide Nanocomposite. *Talanta* **2021**, 233.
  - (6) Sipuka, D. S.; Sebokolodi, T. I.; Olorundare, F. O. G.; Muzenda, C. Electrochemical Sensing of Epinephrine on a Carbon Nanofibers and Gold Nanoparticle - Modified Electrode. *Electrocatalysis* **2023**, 9–17.
  - (7) Shaikshavali, P.; Reddy, T. M.; Gopal, T. V.; Venkataprasad, G.; Kotakadi, V. S.; Palakollu, V. N.; Karpoornath, R. A Simple Sonochemical Assisted Synthesis of Nanocomposite ( ZnO / MWCNTs ) for Electrochemical Sensing of Epinephrine in Human Serum and Pharmaceutical Formulation. *Colloids Surfaces A* **2020**, 584, 124038.
  - (8) Kumar, S.; Singh, D.; Pathania, D.; Awasthi, A.; Singh, K. Molybdenum Disulphide-Nitrogen Doped Reduced Graphene Oxide Heterostructure Based Electrochemical Sensing of Epinephrine. *Mater. Chem. Phys.* **2023**, 297 (October 2022), 127446.
  - (9) Tezerjani, M. D.; Benvidi, A.; Firouzabadi, A. D.; Mazloum-ardakani, M.; Akbari, A. Epinephrine Electrochemical Sensor Based on a Carbon Paste Electrode Modified with Hydroquinone Derivative and Graphene Oxide Nano- Sheets : Simultaneous Determination of Epinephrine , Acetaminophen and Dopamine. *Measurement* **2017**, 101, 183–189.
  - (10) Kiranmai, S.; Kuchi, C.; Sravani, B.; Luczak, T.; Jong, M.; Madhavi, G.; Manohara, Y.

V. Construction of Ultrasensitive Electrochemical Sensor Using TiO<sub>2</sub>- Reduced Graphene Oxide Nanofibers Nanocomposite for Epinephrine Detection. *Surfaces and Interfaces* **2022**, 35, 102455.
